# Supplementary material
Source: Royal Society of Chemistry journal article supplement (https://www.rsc.org/suppdata/dt/1999/4475/906717e.doc)
Supplement: Supplementary file 1 [file 906717e.doc]

**Additional experimental and spectroscopic data**

***trans*-[Ru(2-H2)(CNH)(dppm)2](OTf)2 (4Ru1)**. 1H NMR (CD2Cl2, 193 K, 200 MHz):  12.8 (bs, N*H*),  7.7-6.8 (m, PC6*H5*), 5.1 (br, 4 H, PC*H2*), -3.7 (br, 2 H, Ru*H2*).

***trans*-[Fe(H2)(CN)(dppe)2](OTf),** **3Fe2**. 1H NMR (300 MHz; CD2Cl2) 8.0-6.6 (m, phenyl), 2.94 (br s, CH2), 2.46 (br s, CH2), ‑8.67 ppm (br s, Fe*H*2). T (K), T1(obs), T1(calc) by use of o=3.7 ps, Ea=2.1 kcal/mol: 308, 17.5, 17.9; 283, 14.5, 14.7; 272, 12.4, 12.5; 234, 11.6, 11.7; 210, 12.4, 13.1; 186, 19.4, 19.6.

***trans*-[Fe(HD)(CN)(dppe)2](OTf),** **3Fe2-*d***. 1H NMR (300 MHz; CD2Cl2) ‑8.6 ppm (1:1:1 t m, 1*J*HD 32.7 Hz, FeHD).

***trans*-[Fe(H2)(CNH)(dppe)2](OTf)2,** **4Fe2**. IR (film on NaCl) 2056 cm-1 (CN); (CH2Cl2 solution) 2059 cm-1. 1H NMR (500 MHz; CD2Cl2) 8.79 ppm (br 1:1:1 t, 1*J*NH = 80 Hz, NH), 8.0-6.6 ppm (m, phenyl), 2.86 ppm (s, CH2), 2.39 ppm (s, CH2), -9.08 ppm (br s, Fe*H*2). T (K), T1(obs), T1(calc) by use of o=5.1 ps, Ea=1.9 kcal/mol: 286, 22.3, 22.4; 270, 21.8, 21.7; 252, 21.8, 21.8; 234, 23.2, 23.5; 215, 27.5, 27.5.

***trans*-[Fe(HD)(CND)(dppe)2](OTf)2,** **4Fe2-*d*2**. 31P{1H} NMR (121 MHz; CD2Cl2) 69.4 ppm (s). 1H NMR (300 MHz; CD2Cl2) -9.03 ppm (1:1:1 t m, 1*J*HD 32.5 Hz, FeHD).

***trans*-[Ru(2-H2)(CN)(dppe)2](OTf) (3Ru2).** 1H NMR (300 MHz, CD2Cl2):  7.8-6.8 (m, 40 H, PC6*H5*),  2.3-2.9 (m, 8 H, C*H2*),  -7.3 (br, Ru-*H2*).

***trans*-[Ru(2-HD)(CN)(dppe)2](OTf) (3Ru2-*d*).** 1H NMR (300 MHz, CD2Cl2, -10 C):  -7.2 (tq, 1*J*(HD) = 32.5 Hz, 2*J*(HP) = 5 Hz, Ru-*H*D).

***trans*-[Ru(2-H2)(CN)(dppe)2](TfO···HOTf) (3’Ru2).** 1H NMR (300 MHz, CD2Cl2):  13.1 (s, TfO···*H*OTf),  7.8-6.6 (m, 40 H, PC6*H5*),  3.0-2.5 (m, 8 H, C*H2*),  -5.5 (br, Ru-*H2*); T (K), *T*1 (ms): 290, 15.8; 271, 13.7; 259, 12.9; 246, 12.6; 240, 12.4; 234, 12.6; 222, 13.2.

***trans*-[Ru(2-HD)(CN)(dppe)2](TfO···DOTf) (3’Ru2-*d*2).** 1H NMR (300 MHz, CD2Cl2):  -5.5 (t, 1*J*(HD) = 32.0 Hz, Ru(2-*H*D)). 31P{1H} NMR (120.5 MHz, CD2Cl2):  54.1 (s).

***trans*-[Ru(2-H2)(CNH)(dppe)2](TfO···HOTf)2 (4'Ru2)**. 1H NMR (300 MHz, CD2Cl2):  12.7 (s, *H*OTf),  10.3 (br, N*H*),  7.8-6.8 (m, 40 H, PC6*H5*),  2.9-2.4 (m, 8 H, C*H2*),  -5.9 (br, Ru-*H2*). T(K), *T*1 (ms): 290, 15.4; 271, 14; 259, 13.7; 247, 13.6; 234, 14.3; 222, 15.4.

***trans*-[Ru(2-HD)(CND)(dppe)2](TfO···DOTf)2 (4'Ru2-*d*4).** 1H NMR (300 MHz, CD2Cl2):  -6.0 (t, 1*J*(HD) = 32.4 Hz, Ru(2-*H*D)). 31P{1H} NMR (120.5 MHz, CD2Cl2):  52.2 (s).

***trans*-[Os(2-H2)(CN)(dppe)2](BF4) (3*Os2).** 1H NMR (300 MHz, CD2Cl2) 6.8-7.4 ppm (m, 40 H, Ph-H), 2.4 and 2.8 ppm (m, 8H, CH2), -6.4 (br s, 2H, Os-H2). 31P NMR(121.5 MHz, CD2Cl2):  21.7 (s with small d, 1J(POs) 162.2 Hz).

***trans*-[Os(2-HD)(CN)(dppe)2](BF4) (3*Os2-d).** 1H NMR (CD2Cl2, 200 MHz,):  -6.4 (t, 1*J*(HD) = 28.7 Hz, Os(2-*H*D)), -9.9 (q, **2Os2**).

***trans*-[Os(2-H2)(13CNH)(dppe)2](OTf)2 (4Os2-c)**. 1H NMR (CD2Cl2, 233 K, 300 MHz):  10.8 (d, 1 H, N-H, 2*J*(HC) = 30.8 Hz), 6.6-7.5 (m, PC6*H5*), 2.3-3.0 (m, 8 H, C*H2*), ‑6.1 (br, 2 H, Os*H*2). 31P{1H} NMR (CD2Cl2, 293 K): 22.0 (d2*J*(PC) = 9.6 Hz, 1*J*(POs) = 158.4 Hz). 13C{1H} NMR (CD2Cl2, 293 K, 75.5 MHz):  131.6 (br q, CNH), 132.9-129.5 (PC6*H5*), 32.6 (m, C*H2*)

***trans*-[Ru(2-H2)(CN)(dppp)2](OTf) (3Ru3).** 1H NMR (CD2Cl2, 293 K, 200 MHz):  7.6-6.8 (m, PC6*H5*), 2.5 (br, 8 H, PC*H2*), 2.0 (br, 4 H, PCH2C*H2*). ),  -5.4 (br, Ru-*H2*). 31P{1H} NMR (CD2Cl2, 183 K, 81 MHz):  2.7 (t), 16.8 (t, *J*(P,P') = 28.9 Hz). ***trans*-[Ru(2-H2)(13CN)(dppp)2](OTf) (3Ru3-c).** 31P{1H} NMR (CD2Cl2, 293 K, 81 MHz):  9.7 (d, 2*J*(PC) = 14.3 Hz). 13C{1H} NMR (CD2Cl2, 293 K, 50 MHz):  142.4 (q, 2*J*(CP) = 14.6 Hz).

***trans*-[Ru(2-HD)(CN)(dppp)2](OTf) (3Ru3-*d*).** 1H NMR (CD2Cl2, 200 MHz,):  -5.4 (tq, 1*J*(HD) = 31.6 Hz, 2*J*(HP) = 3 Hz, Ru(2-*H*D)). 31P{1H} NMR (CD2Cl2, 293 K, 81 MHz):  9.7 (bs).

***trans*-[Ru(2-H2)(CNH)(dppp)2](OTf)2 (4Ru3).** IR (CH2Cl2), cm-1: (CN) 2125 (s). 1H NMR (CD2Cl2, 293 K, 200 MHz):  7.6-6.9 (m, PC6*H5*), 2.4 (br, 8 H, PC*H2*), 1.9 (br, 2 H, PCH2C*H2*), 1.6 (br, 2 H, PCH2C*H2*), -4.2 (br, 2 H, Ru*H*2). 31P{1H} NMR (CD2Cl2, 183 K, 81 MHz):  3.2 (t), 15.6 (t, *J*(P,P') = 30.1 Hz). ***trans*-[Ru(2-H2)(13CNH)(dppp)2](OTf)2 (4Ru3-c).** 31P{1H} NMR (CD2Cl2, 293 K, 81 MHz):  8.9 (d, 2*J*(PC) = 13.5 Hz). 13C{1H} NMR (CD2Cl2, 293 K, 50 MHz):  149.9 (q, 2*J*(CP) = 13.6 Hz). ***trans*-[Ru(2-H2)(C15NH)(dppp)2](OTf)2 (4Ru3-n).** 1H NMR (CD2Cl2, 183 K, 200 MHz):  13.2 (d, *J*(15NH) = 108.1 Hz, N*H*).

***trans*-[Ru(2-HD)(CND)(dppp)2](OTf)2 (4Ru3-*d*2** 1H NMR (CD2Cl2, 293 K, 200 MHz):  -4.2 (t, 1*J*(HD) = 31.8 Hz, Ru(2-*H*D)). 31P{1H} NMR (CD2Cl2, 293 K, 81 MHz):  8.9 (bs).

**[Os(2-H2)(CNH)(dppp)2](OTf)2 (4Os3).** IR (Nujol), cm-1: (CN) 2129 (s). 1H NMR (CD2Cl2, 293 K, 200 MHz):  7.6-6.9 (m, PC6*H5*), 2.7 (br, 8 H, PC*H2*), 1.9 (br, 2 H, PCH2C*H2*), 1.5 (br, 2 H, PCH2C*H2*), -4.6 (br, 2 H, Os*H2*), T = 183 K,  14.1 (br, N*H*). 31P{1H} NMR (CD2Cl2, 173 K, 81 MHz):  -35.5 (t), -21.7 (t, *J*(P,P') = 18.3 Hz). ***trans*-[Os(2-H2)(13CNH)(dppp)2](OTf)2 (4Os3-c).** 31P{1H} NMR (CD2Cl2, 293 K, 81 MHz):  ‑29.4 (d, 2*J*(PC) = 7.9 Hz). 13C{1H} NMR (CD2Cl2, 293 K, 50 MHz):  133.2 (q, 2*J*(CP) = 10.2 Hz). ***trans*-[Os(2-H2)(C15NH)(dppp)2](OTf)2 (4Os3-n).** 1H NMR (CD2Cl2, 193 K, 200 MHz):  14.1 (d, *J*(15NH) = 101.4 Hz, N*H*). 15N NMR (CD2Cl2, 183 K, 51 MHz):  -205.0 (d, *J*(15NH) = 102.5 Hz, *N*H).

***trans*-[Os(2-HD)(CND)(dppp)2](OTf)2 (4Os3-*d*2).** 1H NMR (CD2Cl2, 293 K, 200 MHz):  -4.6 (t, 1*J*(HD) = 28.8 Hz, Os(2-*H*D)). 31P{1H} NMR (CD2Cl2, 293 K, 81 MHz):  -29.4 (bs).

**Preparation of *trans*-[Fe(H2)(CN)(depe)2](BF4),** **3*Fe4**. 1H NMR (400 MHz; C6D6): 1.85 (br s, CH2), 1.15 ppm (br s, CH2), –14.05 ppm (br s, Fe-*H*2).

***trans*-[Ru(2-H2)(CN)(depe)2](BF4) (3*Ru4).** 1H NMR (300 MHz, CD2Cl2):  2.0-2.5 (m, 8 H, PC*H2*C*H2*P),  1.6-2.0 (m, 16 H, C*H2*CH3),  1.0-1.4 (m, 24 H, CH2C*H3*),  -9.1 (br, Ru-*H2*). T(K), *T*1 (ms): 290, 43.6; 270, 33.2; 259, 28.4; 247, 23.5; 234, 19.8; 228, 18.3; 222, 16.5; 216, 15.3; 210, 14.2; 204, 13.4; 198, 13; 191, 12.8; 185, 14.1; 179, 16.

***Trans-*[Os(2-H2)(13CN)(depe)2](OTf) (3Os4-c).** IR (Nujol), cm-1: (13CN) 2064. 1H NMR (CD2Cl2, 300 MHz):  2.6-1.0 (m, 48 H, depe), -9.5 (br, 2 H, Os*H2*). 31P{1H} NMR (CD2Cl2):  21.7 (d, *J*(PC) = 11.8 Hz). 13C{1H} NMR (CD2Cl2, 75.5 MHz):  120.9 (q, CN), 23.2, 22.2, 21.9, 21.1 (P*C*H2), 9.3, 8.4 (*C*H3).

***Trans-*[Os(2-HD)(13CN)(depe)2](OTf) (3Os4-c,d).** 1H NMR (CD2Cl2, 300 MHz,):  -9.5 (t, 1*J*(HD) = 25.4 Hz, Os(2-*H*D)), -9.5 (b, Os(2-*H*2), nulled by inversion recovery experiment).

***Trans-* [Os(2-H2)(CNH)(depe)2](OTf)2 (4Os4).** 1H NMR (CD2Cl2, 300 MHz):  11.1 (b, 1 H, N-H), 2.3-1.0 (m, 48 H, depe), -8.1 (br, 2 H, Os*H*2). 31P{1H} NMR (CD2Cl2, 293 K): 17.9 (s with satellites, 1*J*(POs) = 155.3 Hz).

***trans*-[Ru(OTf)(CN)(dppe)2] (5Ru2).** 1H NMR (300 MHz, CD2Cl2):  6.9-7.8 (m, 40 H, PC6*H5*),  2.7-2.9 (m, 8 H, C*H2*). 31P{1H} NMR (120.5 MHz, CD2Cl2):  52.1 ppm (s). Anal. Calcd for C54H48F3NO3P4RuS: C, 60.44; H, 4.51; N, 1.30. Found: C, 59.49; H, 4.78; N, 1.26. IR (Nujol), cm-1: (12CN) 2077.6 (s).

***trans*-[Ru(OTf)(CN)(dppp)2] (5Ru3).** 1H NMR (CD2Cl2, 293 K, 200 MHz):  7.9-6.5 (m, PC6*H5*), 2.8 (br, 8 H, PC*H2*), 2.0 (br, 4 H, PCH2C*H2*). 31P{1H} NMR (CD2Cl2, 293 K, 81 MHz):  4.8 (bs). ***trans*-[Ru(OTf)(13CN)(dppp)2] (5Ru3-c).** 31P{1H} NMR (CD2Cl2, 293 K, 81 MHz):  4.8 (d, *J*(13CP) = 13.5 Hz).

***trans*-[Ru(OTf)(CNH)(dppe)2](OTf) (6Ru2).** 1H NMR (300 MHz, CD2Cl2):  10.2 (t, 1*J*(HN) = 79.2 Hz, N*H*),  7.8-6.6 (m, 40 H, PC6*H5*),  3.1-2.6 (m, 8 H, C*H2*). 31P{1H} NMR (120.5 MHz, CD2Cl2):  48.8 (s). Anal. Calcd for C55H49F6NO6P4RuS2: C, 54.01; H, 4.04; N, 1.14. Found: C, 53.66; H, 4.35; N, 1.32. IR (Nujol), cm-1: (CN) + (NH) 2532.6 (w).

***trans*-[Ru(OTf)(CND)(dppe)2](OTf) (6Ru2-*d*).** 31P{1H} NMR (120.5 MHz, CD2Cl2):  48.8 (s). IR (Nujol), cm-1: (CN) + (ND) 2275.4 (m).

***trans*-[Ru(OTf)(CNH)(dppp)2](OTf) (6Ru3).**IR (Nujol), cm-1: (CN) 2074 (w). 1H NMR (CD2Cl2, 293 K, 200 MHz):  7.6-6.7 (m, PC6*H5*), 2.5 (br, 8 H, PC*H2*), 2.1 (br, 4 H, PCH2C*H2*). 31P{1H} NMR (CD2Cl2, 293 K, 81 MHz):  1.8 (br), T = 193 K,  -7.3 (t), 0.9 (t, *J*(P,P') = 32.7 Hz). ***trans*-[Ru(OTf)(13CNH)(dppp)2](OTf) (6Ru3-c).** 31P{1H} NMR (CD2Cl2, 293 K, 81 MHz):  1.9 (d, 2*J*(PC) = 13.5 Hz). 13C{1H} NMR (CD2Cl2, 293 K, 50 MHz):  159.7 (br, 13CNH).

***trans*-[Ru(H2O)(CNH)(dppe)2](OTf)2 (7Ru2).** 1H NMR (300 MHz, CD2Cl2):  11.7 (t, 1*J*(HN) = 70.5 Hz, N*H*),  6.6-7.8 (m, 40 H, PC6*H5*),  3.2 (s, 2 H, *H2*O),  2.4 - 3.0 (m, 8 H, PC*H2*C*H2*P). 31P{1H} NMR (120.5 MHz, CD2Cl2):  48.4 (s).
